# Supplementary material for: Controlling the electronic and magnetic properties of the GeAs monolayer by generating Ge vacancies and doping with transition-metal atoms
Source: Royal Society of Chemistry journal article supplement (doi:10.1039/d4na00235k), 2024-01-01
Supplement: d4na00235k1.pdf [file d4na00235k1.pdf]

## Controlled electronic and magnetic properties of GeAs monolayer by Ge vacancies and doping with transition-metal atoms

D. M. Hoat,<sup>1,2,\*</sup> R Ponce-Pérez,<sup>3</sup> Chu Viet Ha,<sup>4</sup> and J. Guerrero-Sanchez<sup>3</sup>

<sup>1</sup>Institute of Theoretical and Applied Research, Duy Tan University, Ha Noi 100000, Viet Nam

<sup>2</sup>Faculty of Natural Sciences, Duy Tan University, Da Nang 550000, Viet Nam

<sup>3</sup>Universidad Nacional Autónoma de México, Centro de Nanociencias y Nanotecnología, Apartado Postal 14, Ensenada, Baja California, Código Postal 22800, Mexico

<sup>4</sup>Faculty of Physics, TNU-University of Education, Thai Nguyen, 250000, Vietnam

\*Corresponding author: [dominhhoat@duytan.edu.vn](mailto:dominhhoat@duytan.edu.vn)

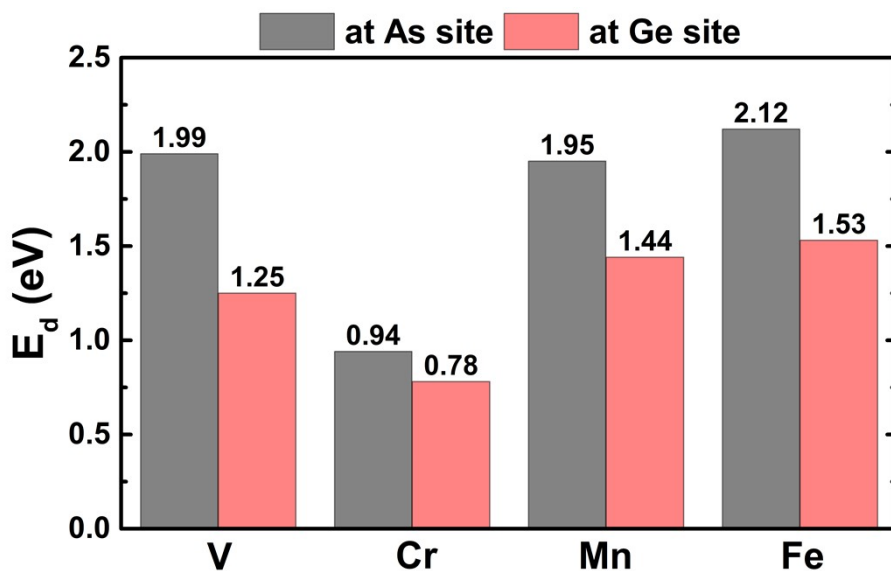

Figure S1: Doping energy of transition metal at Ge and As sites of GeAs monolayer.
